# Supplementary material
Source: Springer Nature journal article supplement (https://www.springermedizin.de/resource/supplementary/12885_2010_2367_MOESM13_ESM.pdf/9461124)

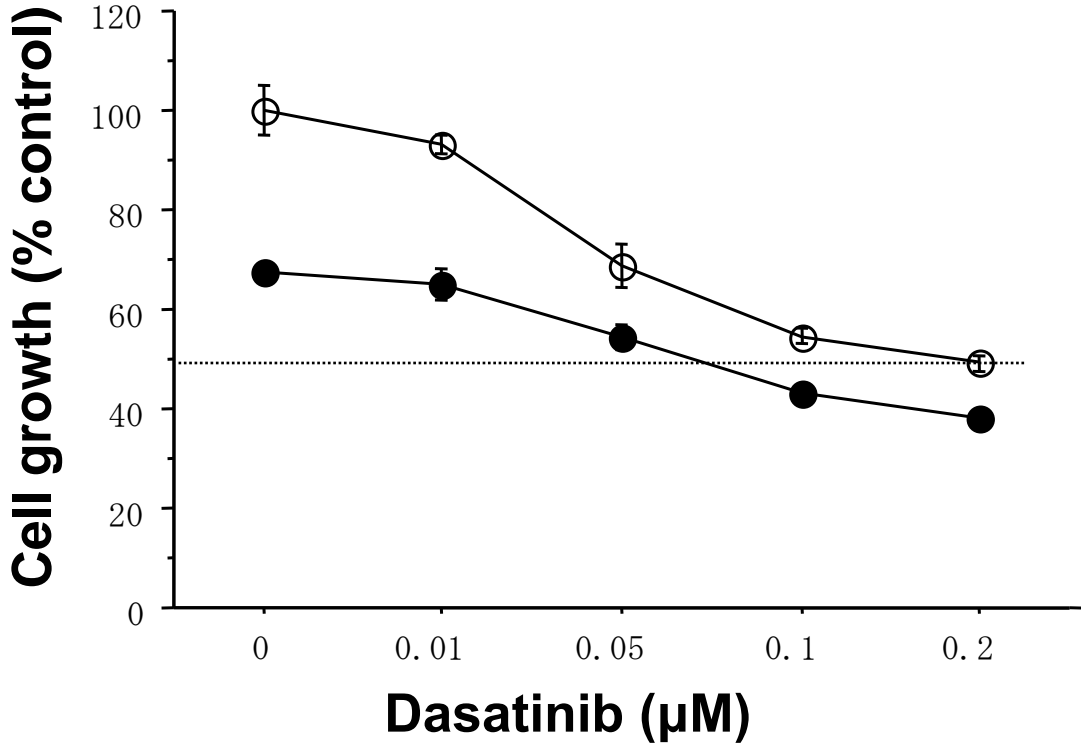

Supplement: MOESM13 [file 9461124]
